# Supplementary material for: Silica Vesicle Nanovaccine Formulations Stimulate Long-Term Immune Responses to the Bovine Viral Diarrhoea Virus E2 Protein
Source: PubMed Central journal article supplement (PMC4668082; doi:10.1371/journal.pone.0143507), 2015-12-02

**A)**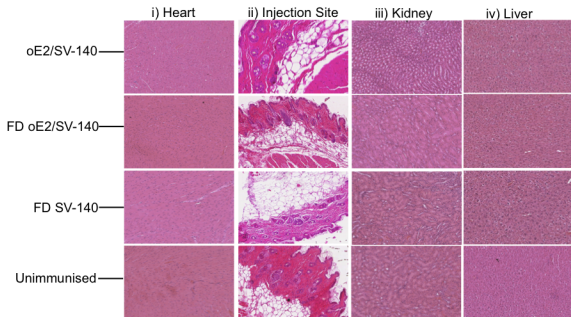**B)**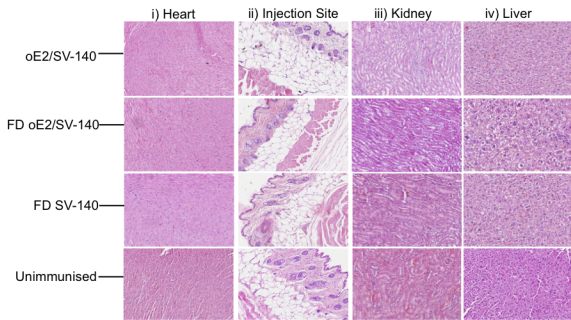

Supplement: pone.0143507.s004.pdf [file pone.0143507.s004.pdf]
