# Supplementary material for: Silica Vesicle Nanovaccine Formulations Stimulate Long-Term Immune Responses to the Bovine Viral Diarrhoea Virus E2 Protein
Source: PubMed Central journal article supplement (PMC4668082; doi:10.1371/journal.pone.0143507), 2015-12-02
Supplement: pone.0143507.s006.pdf [file pone.0143507.s006.pdf]

**S1 Table.** Different concentrations of Trehalose and Glycine tested to freeze-dry oE2/SV-140

| Excipients added | 0.1% Glycine | 0.5% Glycine | 1% Glycine |
|------------------|--------------|--------------|------------|
| 5% Trehalose     | *            | *            | *          |
| 10% Trehalose    | *            | *            | *          |
| 20% Trehalose    | *            | *            | *          |
